# Supplementary material for: A group II intron-encoded protein interacts with the cellular replicative machinery through the β-sliding clamp
Source: PubMed Central journal article supplement — Nucleic Acids Res. 2019 May 25;47(14):7605–17. doi: 10.1093/nar/gkz468 (PMC6698660; doi:10.1093/nar/gkz468), 2019-05-25
Supplement: gkz468_supplemental_files.pdf [file gkz468_supplemental_files.pdf]

## Supplementary Figures

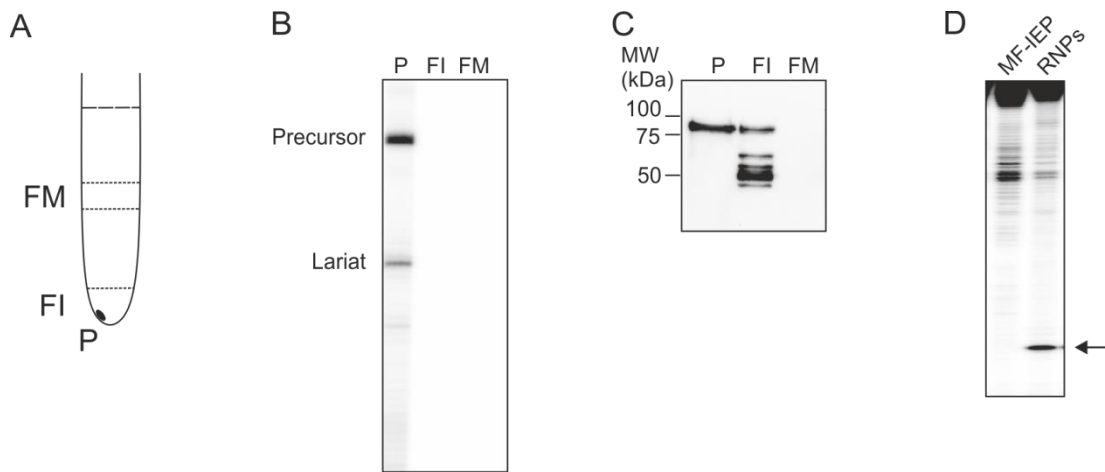

**Figure S1. Detection of intron RNA and MF-IEP protein during RNP preparation.** (A) Fractions taken along the tube during RNP preparations. FM (in the middle), FI (at the bottom) and P (pellet). (B) Primer extension to determine the presence of intron RNA in the different fractions during the RNP preparations. (C) Detection of MF-IEP protein in the fractions was carried out by western blot using antibodies anti-Flag. (D) Endonuclease assay of reconstituted RNPs. Cleavage of substrate was observed only in lane when RNPs were used (RNPs lane arrow) and not when the protein was used.

|                |                                                     |     |
|----------------|-----------------------------------------------------|-----|
| RmInt1-IEP     | MTSE-----STTDKPF-----RIEKRRVYEA                     | 21  |
| 5HHL-Eu.re.I2  | MDT-----SNLME-----QILSSDNLNRA                       | 19  |
| 5HHJ-Ro.in.IEP | MVKSSGTERKERMDTSSLME-----QILSNDNLNRA                | 31  |
| 6AR1-Ge.st.IEP | M-----ALLE-----RILARDNLITA                          | 16  |
| 5G2X-Ll.LtrA   | MKPT-----MAILERISKNSQENIDEVFTRLYRYLLRPDIYYVA        | 39  |
|                | * : *                                               |     |
| RmInt1-IEP     | YKAVKANRGAAGVDGQTLEIFEKDLAANLYKIWNRMSSGTYFPPPVRAVS  | 71  |
| 5HHL-Eu.re.I2  | YLQVVRNKGAEQVDGMKYTELKEHLAKNGETIKGQLRTRKYKQPARRVE   | 69  |
| 5HHJ-Ro.in.IEP | YLQVVRNKGAEQVDGMKYTELKEYLAKNGEIIKEQLRIRKYKQPARRVE   | 81  |
| 6AR1-Ge.st.IEP | LKRVEANQGAPGIDGVSTDQLRDYIRAHWSTIHAQLLAGTYRPAPVRRVE  | 66  |
| 5G2X-Ll.LtrA   | YQNLYSNKGAST-KGILDDTADGFSEEKIKKIIQSLKDGTYYPQPVRRMY  | 88  |
|                | : *:* .* : * : .* * * .*                            |     |
| RmInt1-IEP     | IPKKAG-GERVLGVPTVSDRIAQMVKQMIEPDLDSLFLPDSYGYRPGKS   | 120 |
| 5HHL-Eu.re.I2  | IPKPDG-GVRNLGVPTVTDRFIQQAIQVLTPIYEEQFHDHSYGFRPNRC   | 118 |
| 5HHJ-Ro.in.IEP | IPKPDG-GVRNLGVPTVTDRFIQQAIQVLTPIYEEQFHDHSYGFRPNRC   | 130 |
| 6AR1-Ge.st.IEP | IPKPGG-GTRQLGIPTVVDRLIQQAILQELTPIFDPDFSSSSFGFRPGRN  | 115 |
| 5G2X-Ll.LtrA   | IAKKNSKMRPLGIPTFTDKLIQEAVRIILESIIYEPVFEVDSHGFRPQRS  | 138 |
|                | *.* . * **:* . *:: * .: : . : * *.*:** :            |     |
| RmInt1-IEP     | ALDAVGVTRQR-CWKYDWWLEFDIKGLFDNLPHDLLLLKAVRKDVKCNWAL | 169 |
| 5HHL-Eu.re.I2  | AQQAILTALNIMNDGNDWIVDIDLEKFFDTVNHDKLMTLIGRTIKDGDVI  | 168 |
| 5HHJ-Ro.in.IEP | AQQAILTALDMMNDGNDWIVDIDLEKFFDTVNHDKLMTLIIGRTIKDGDVI | 180 |
| 6AR1-Ge.st.IEP | AHDAVRQAQGYIQEGYRYVVDMDLEKFFDRVNHDILMSRVARKVKDKRVL  | 165 |
| 5G2X-Ll.LtrA   | CHTALKTIKRE-FGGARWFVEGDIKGCFDNIDHVTLIGLINLKIKDMKMS  | 187 |
|                | . * : : : * : * * : * * : : *                       |     |
| RmInt1-IEP     | LYIERWLTAPMEKNGEVIERSRGTPQGGVSPILANLFLHYAFDLWM---   | 216 |
| 5HHL-Eu.re.I2  | SIVRKYLVSIMIDDEYEDSIVGTPQGGNLSPLLANIMLNE-LDKEM---   | 214 |
| 5HHJ-Ro.in.IEP | SIVRKYLVSIMIDDEYEDSIVGTPQGGNLSPLLANIMLNE-LDKEM---   | 226 |
| 6AR1-Ge.st.IEP | KLIRAYLQAGVMIEGVKQVTEEGTPQGGPLSPLLANILLDD-LDKEL---  | 211 |
| 5G2X-Ll.LtrA   | QLIYKFLKAGYLENQYHKTYSGTPQGGILSPLLANIYLHE-LDKFVLQL   | 236 |
|                | : :* : : . ***** :**:* : * . : *                    |     |
| RmInt1-IEP     | -----                                               | 216 |
| 5HHL-Eu.re.I2  | -----                                               | 214 |
| 5HHJ-Ro.in.IEP | -----                                               | 226 |
| 6AR1-Ge.st.IEP | -----                                               | 211 |
| 5G2X-Ll.LtrA   | KMKFDRESPERITPEYRELHNEIKRISHRLKLEGEKAKVLLLEYQEKRK   | 286 |
| RmInt1-IEP     | -----TRTHPDLPCRYADDGLVHCQ-SEQQAEALRVELSSRLA-AC      | 256 |
| 5HHL-Eu.re.I2  | -----EKRGLNFVRYADDCIIMVG-SEMSANRVMRNISRFIEEKL       | 253 |
| 5HHJ-Ro.in.IEP | -----EKRGLNFVRYADDCIIMVG-SEMSANRVMRNISRFIEEKL       | 265 |
| 6AR1-Ge.st.IEP | -----EKRGLKFCRYADDCNIYVK-SLRAGQVRKQSIQRFLEKTL       | 250 |
| 5G2X-Ll.LtrA   | RLPTLPCTSQTNKVLKYVRYADDFIISVKGSKEDCQWIKEQLKLFHKNKL  | 336 |
|                | : * : ***** : * : : . : :                           |     |
| RmInt1-IEP     | GLQMHPKTKIVYCKDQRRREAYPNVTFDFLGYQFRPRRVANTQRDEFFC   | 306 |
| 5HHL-Eu.re.I2  | GLKVNMTKSKVDR-----PS-GLKYLGFYFDYDPRAH-----          | 284 |
| 5HHJ-Ro.in.IEP | GLKVNMTKSKVDR-----PR-GIKYLGFYFYDTSAQ-----           | 296 |
| 6AR1-Ge.st.IEP | KLKVNEEKSAVDR-----PW-KRAFLGFSFTPERKARIRLAPRS-       | 288 |
| 5G2X-Ll.LtrA   | KMELSEKTLITH-----SSQPARFLGYDIRVRRSGTIKRSKGVK        | 376 |
|                | : : * : : . : ** : :                                |     |

|                |                                                    |     |
|----------------|----------------------------------------------------|-----|
| RmInt1-IEP     | GYTPAVSPTALKSMRATIKSLNIPRQT-----PGTLA              | 338 |
| 5HHL-Eu.re.I2  | -----                                              | 284 |
| 5HHJ-Ro.in.IEP | -----                                              | 296 |
| 6AR1-Ge.st.IEP | -----IQRLKQIRIRQLTNPNS-----ISMP                    | 309 |
| 5G2X-Ll.LtrA   | KRTLNGSVELLIPLQDKIRQFIFDKKIAIQKKDSSWFPVHRKYLIRSTDL | 426 |
|                |                                                    |     |
| RmInt1-IEP     | EIAKQLNPLLRGWIAYYGRYS-----RSALSTLADYVNQKLR         | 375 |
| 5HHL-Eu.re.I2  | -----                                              | 284 |
| 5HHJ-Ro.in.IEP | -----                                              | 296 |
| 6AR1-Ge.st.IEP | ERIHRVNQYVMGWIGYFRLVET-----PSVLQTIIEGWIRRLR        | 347 |
| 5G2X-Ll.LtrA   | EIITIYNSELRGICNYYGLASNFNQLNYFAYLMEYSCLKTIASKHKGTLS | 476 |
|                |                                                    |     |
| RmInt1-IEP     | A-----WIRRKFRFQSHK-----                            | 389 |
| 5HHL-Eu.re.I2  | -----                                              | 284 |
| 5HHJ-Ro.in.IEP | -----                                              | 296 |
| 6AR1-Ge.st.IEP | LCQ-----WLQW--KRVRT-----                           | 359 |
| 5G2X-Ll.LtrA   | KTISMFKDGSWSWGIPIYEIKQKQRRYFANFSECKSPYQFTDEISQAPVL | 526 |
|                |                                                    |     |
| RmInt1-IEP     | -----                                              | 389 |
| 5HHL-Eu.re.I2  | -----                                              | 284 |
| 5HHJ-Ro.in.IEP | -----                                              | 296 |
| 6AR1-Ge.st.IEP | -----RIRELRALGLKETAVMEIANTRKGAWRTTKTPQLHQ          | 395 |
| 5G2X-Ll.LtrA   | YGYARNTLENRLKAKCCELCGTSDENTS-YEI-----HHVNKVKVN     | 565 |
|                |                                                    |     |
| RmInt1-IEP     | --TRASLFLRKLARENPGLEFV--HWKAFGTNT-FT               | 419 |
| 5HHL-Eu.re.I2  | -----QFK-----AKP-HA                                | 292 |
| 5HHJ-Ro.in.IEP | -----QFK-----AKPHAK                                | 305 |
| 6AR1-Ge.st.IEP | ALGKTYWTAQGLKSLTQRYFEL-RQGHHHHHH-HH                | 428 |
| 5G2X-Ll.LtrA   | LKGKEKWEMAMIAKQRKTLVVCFHCHRHVVIHK-HK               | 599 |

:

**Figure S2. Structure-based sequence alignment of IEPs.** The sequence of RmInt1 IEP is aligned to the sequences of Eu.re.I2 (from PDB: 5HHL), Ro.in.IEP (from PDB: 5HHJ), Ge.st.IEP (from PDB: 6AR1) and LtrA (from PDB: 5G2X). The QMxxxxLxxLFL motif is highlighted in yellow

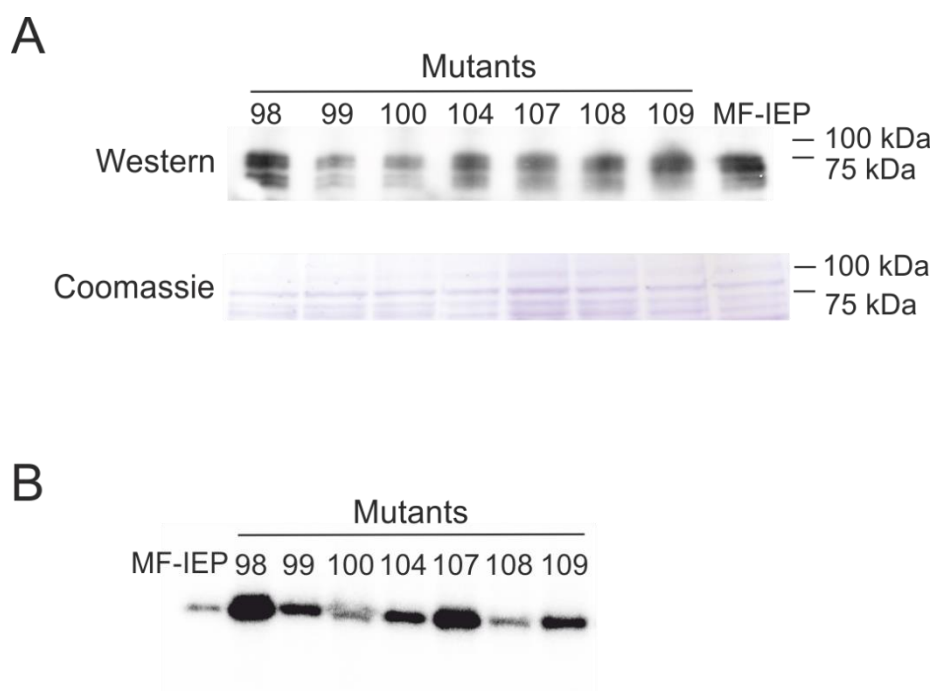

**Figure S3.** (A). Western analysis using anti-Flag antibodies of mutants done in MF-IEP. Protein loaded in each lane is shown in the panel labelled as Coomassie (B) Primer extension of mutants of MF-IEP protein.

## **Supplementary material and methods**

### **Primer extension**

15 µg RNA samples were annealed with 300,000 c.p.m. 5'-labeled P primer (5'-TGAAAGCCGATCCCGGAG-3') in 10 mM Pipes (pH 7.5) and 400 mM NaCl by heating at 85°C for 5 minutes and fast cooling to 60°C followed by slow chilling to 45°C. The cDNA was synthesized using AMV Reverse Transcriptase (Roche Diagnostics) in the presence of 50 mM Tris-HCl pH 8.0; 60 mM NaCl; 10 mM DTT; 6 mM MgOAc; 1 mM dNTPs; 60 µg/ml actinomycin D (Sigma-Aldrich) and 0.4 U RNase Inhibitor (NEB) at 42°C for 60 minutes. The reactions were ethanol precipitated and the products were separated by denaturing 6% polyacrylamide gel electrophoresis

### **Endonuclease assays.**

For DNA cleavage assays, 5' end-labeled gel-purified 70-mer single-stranded DNA oligonucleotide (300,000 cpm) was incubated with reconstituted RNP s (1.5 µg) or MF-IEP protein (1.5 µg) at 37°C for 2 h in reaction buffer [50 mM Tris-HCl pH 7.5, 10 mM KCl, 25 mM MgCl<sub>2</sub>, 5 mM DTT]. The reactions were extracted with phenol-chloroform-isoamyl alcohol (25:24:1) followed by ethanol precipitation, and the products were separated by denaturing 7 M urea- 6% (w/v) polyacrylamide gel electrophoresis. Bands were revealed by dry gel exposition to digital imaging plates (Fuji), which were scanned using Quantity One software (Bio-Rad).
